# Supplementary material for: Towards a Refined Climate Urbanism Typology: Comparing Local Policy Debates in German and American cities
Source: Research Square preprint supplement (doi:10.21203/rs.3.rs-4613977/v1), 2024-08-08
Supplement: Supplementary file 1 [file 0e81b5f67f7c3f0d07167e7e.docx]

For access to the data

Data stored

<https://github.com/MelNa18/CA-BW-climate-policy.git>
